# Supplementary material for: Navigating the wild west: a review of guidance on clinical communications using personal BYOD, IM and third-party apps in the UK and Ireland
Source: Frontiers journal article supplement (doi:10.3389/fdgth.2024.1457848), 2025-01-06
Supplement: Data_Sheet_1.pdf [file Data_Sheet_1.pdf]

## Entities Contacted

| Number | Name                                                                            | "X" Handle       | Contact Details                           | Country |
|--------|---------------------------------------------------------------------------------|------------------|-------------------------------------------|---------|
| 1      | Royal College of Anaesthetists                                                  | @RCoAnews        |                                           | UK      |
| 2      | British Dental Association (BDA)                                                |                  | enquiries@bda.org                         | UK      |
| 3      | Faculty of Dental Surgery at The Royal College of Surgeons                      | @FDS_RCS         |                                           | UK      |
| 4      | Faculty of Dental surgery of Edinburgh (Royal College of Surgeons of Edinburgh) | @RCSEdFDS        |                                           | UK      |
| 5      | Royal College of Emergency Medicine                                             | @RCollEM         | communications@rcem.ac.uk                 | UK      |
| 6      | Royal College of General Practitioners                                          | @RCGP            |                                           | UK      |
| 7      | Faculty of Intensive Care Medicine                                              | @FICMNews        |                                           | UK      |
| 8      | Royal College of Obstetricians and Gynaecologists                               | @RCObsGyn        |                                           | UK      |
| 9      | Faculty of Occupational Medicine                                                | @FOMNews         |                                           | UK      |
| 10     | Royal college of Ophthalmologists                                               | @RCOPhth         |                                           | UK      |
| 11     | Royal College of Paediatrics and Child Health                                   | @RCPCH           |                                           | UK      |
| 12     | Royal College of Pathologists                                                   | @RCPATH          | comms@rcpath.org                          | UK      |
| 13     | Faculty of Pharmaceutical Medicine                                              | @FacultyPharmMed |                                           | UK      |
| 14     | Royal College of Physicians of Edinburgh                                        | @RCPEdin         |                                           | UK      |
| 15     | Royal College of Physicians of Ireland                                          | @RCPI_news       |                                           | Ireland |
| 16     | Royal College of Physicians                                                     | @RCPhysicians    |                                           | UK      |
| 17     | Royal College of Physicians and Surgeons of Glasgow                             | @rcpsglasgow     |                                           | UK      |
| 18     | Royal College of Psychiatrists                                                  | @rcpsych         | press@rcpsych.ac.uk                       | UK      |
| 19     | Royal College of Psychiatrists in Scotland                                      |                  | pressscotland@rcpsych.ac.uk               | UK      |
| 20     | Faculty of Public Health                                                        | @FPH             | JulianRyder@fph.org.uk<br>news@fph.org.uk | UK      |
| 21     | Royal College of Radiologists                                                   | @RCRadiologists  |                                           | UK      |
| 22     | Faculty of Sexual and Reproductive Health                                       | @FSRH_UK         |                                           | UK      |

|    |                                                 |                                             |                                                                     |         |
|----|-------------------------------------------------|---------------------------------------------|---------------------------------------------------------------------|---------|
| 23 | Royal College of Surgeons of Edinburgh          | @RCSEd                                      | pressoffice@rcsed.ac.uk<br>rcsed@tigerbond.com<br>comms@rcsed.ac.uk | UK      |
| 24 | Royal College of Surgeons of England            | @RCSnews                                    | PressOffice@rcseng.ac.uk<br>(+44) 20 7869 6053                      | UK      |
| 25 | Royal college of Surgeons of Ireland            | @RCSI_Irl                                   |                                                                     | Ireland |
| 26 | Faculty of Sport and Exercise Medicine UK       | @FSEM_UK                                    |                                                                     | UK      |
| 27 | Royal College of Nursing                        | @RCN                                        | Contact Box on RCN Website                                          | UK      |
| 28 | Royal College of Midwives                       | @MidwivesRCM                                | Contact Box on RCM Website                                          | UK      |
| 29 | Nursing and Midwifery Board of Ireland          | @NMBI                                       | EducationandGuidance@NMBI.ie                                        | Ireland |
| 30 | Irish Nurses and Midwives Organisation (INMO)   |                                             | aileen.garrihy@inmo.ie                                              | Ireland |
| 31 | Health Service Executive (HSE)                  | @HSELive                                    | Kavish.Naicker@hse.ie                                               | Ireland |
| 32 | General Medical Council (GMC)                   | @GMCUK                                      | gmcpress@gmc-uk.org<br>standards@gmc-uk.org<br>(+44) 161 923 6602   | UK      |
| 33 | Irish Medical Council                           | @MedCouncilIRL                              | educationandtraining@mcirl.ie<br>rachael.kelly@mcirl.ie             | Ireland |
| 34 | College of Anaesthesiologists of Ireland        | @COAIrl                                     |                                                                     | Ireland |
| 35 | MediSec (profesional indemnity)                 | @MedisecIreland                             | info@medisec.ie                                                     | Ireland |
| 36 | Irish College of General Practitioners          | @ICGPnews                                   | library@icgp.ie                                                     | Ireland |
| 37 | Irish College of Ophthalmologists               | @eyedoctorsIRL<br>D39@IALabs<br>@Vision_Irl |                                                                     | Ireland |
| 38 | The Irish Dental Association (IDA)              | @IrishDentists                              |                                                                     | Ireland |
| 39 | Dental Council of Ireland                       | @DentalCouncilPr                            | Ino@dentalcouncil.ie                                                | Ireland |
| 40 | The British Association of Oral Surgeons (BAOS) | @BAOS_UK                                    |                                                                     | UK      |
| 41 | The British Orthodontic Society (BOS)           | @BOSbraces                                  |                                                                     | UK      |
| 42 | Irish Society for Dentistry for Children        | @isdc_ie                                    |                                                                     | Ireland |

|    |                                                                                                                   |                   |                                                                                    |         |
|----|-------------------------------------------------------------------------------------------------------------------|-------------------|------------------------------------------------------------------------------------|---------|
| 43 | Orthodontic Society of Ireland                                                                                    | @Orthosocirl- OSI |                                                                                    | Ireland |
| 44 | Queen Victoria hospital trust                                                                                     |                   | qvh.communications@nhs.net                                                         | UK      |
| 45 | The Medical Defence Union (MDU)                                                                                   | @the_mdu          |                                                                                    | UK      |
| 46 | The British Medical Association (BMA)                                                                             |                   | SAdmin@bma.org.uk<br>support@bma.org.uk<br>SAdmin@bma.org.uk<br>(+44) 300 123 1233 | UK      |
| 47 | Princess Royal University Hospital (PRUH), CEO                                                                    | @AngelaHelleur    |                                                                                    | UK      |
| 48 | Midwife for the Highlands and Islands,<br>Confidential Cpersonal Communication asking for<br>her NHS Trust policy |                   |                                                                                    | UK      |
| 49 | The Nursing and Midwifery Council (NMC)                                                                           | @NMCnews          | media@nmc-uk.org                                                                   | UK      |
| 50 | St Vincents hospital                                                                                              |                   | Dataprotection@st-vincent.s.ie<br>dataprotection@st-vincent.s.ie                   | Ireland |
| 51 | Great Ormond St Hospital (GOSH)                                                                                   |                   | SAR@gosh.nhs.uk<br>media@gosh.nhs.uk                                               | UK      |
| 52 | General Dental Council (GDC)                                                                                      | @GDC_UK           | communications@gdc-uk<br>policyinbox@gdc-uk.org                                    | UK      |
| 53 | Medical Protection (MP)                                                                                           | @MPS_Medical      | education@medicalprotection.org<br>replyeventsupport@medicalprotection.org         | UK      |
| 54 | The Mater Private Hospital                                                                                        | @materprivate     | dataprotectionofficer@materprivate.ie                                              | Ireland |
| 55 | Blackrock Health (Private Health Group)                                                                           |                   | dpo@blackrockhealth.ie                                                             | Ireland |
| 56 | Blackrock Clinic (Private Hospital)                                                                               |                   | DPO@Blackrock-clinic.com                                                           | Ireland |
| 57 | Hermitage Clinic (Private Hospital)                                                                               |                   | dpo@hermitageclinic.ie                                                             | Ireland |
| 58 | Galway Clinic (Private Hospital)                                                                                  |                   | dpo@galwayclinic.com                                                               | Ireland |
| 59 | The Beacon Hospital (Private Hospital)                                                                            |                   | dataprotection@beaconhospital.ie<br>margaret.callanan@beaconhospital.ie            | Ireland |
| 60 | St James Hospital                                                                                                 |                   | dataprotection@stjames.ie                                                          | Ireland |

|    |                                            |           |                                                                                                                                                                             |         |
|----|--------------------------------------------|-----------|-----------------------------------------------------------------------------------------------------------------------------------------------------------------------------|---------|
| 61 | National Health Service (NHS)              | @NHSuk    |                                                                                                                                                                             | UK      |
| 62 | Cork University Hospital (CUH)             | @CUH_Cork |                                                                                                                                                                             | Ireland |
| 63 | The Dental Defence Union (DDU)             | @the_ddu  |                                                                                                                                                                             | Ireland |
| 64 | University Hospital Dorset NHS Trust (UHD) |           | richard.moremon@uhd.nhs.uk                                                                                                                                                  | UK      |
| 65 | Kings College Hospital NHS Trust           |           | kch-tr.FOI@nhs.net<br><a href="https://www.kch.nhs.uk/document/freedom-of-information-request-form">https://www.kch.nhs.uk/document/freedom-of-information-request-form</a> | UK      |
| 66 | Leicestershire Partnership NHS Trust       |           | <a href="https://www.leicspart.nhs.uk/about/freedom-of-information-requests/">https://www.leicspart.nhs.uk/about/freedom-of-information-requests/</a> website               | UK      |
| 67 | The Mater (HSE Public Hospital)            |           | info@mater.ie<br>(+353) 1 803 2333                                                                                                                                          | Ireland |
| 68 | Leicestershire Partnership NHS Trust       |           | LPT.DataPrivacy@nhs.net                                                                                                                                                     | Ireland |
| 69 | The Wellcome Trust                         |           | <a href="https://wellcome.org/who-we-are/contact-us">https://wellcome.org/who-we-are/contact-us</a>                                                                         | UK      |
